# Supplementary material
Source: PubMed Central journal article supplement (PMC6612318)
Supplement: NIHMS1525119-supplement-1.pdf [file NIHMS1525119-supplement-1.pdf]

Supplemental Table 1

Supporting data for Fig. 1E

| E13.5 | GFP+ E-Cad+ | Total E-cad+ | Percent | E15.5 | GFP+ E-Cad+ | Total E-cad+ | Percent |
|-------|-------------|--------------|---------|-------|-------------|--------------|---------|
| #1    | 13.00       | 465.00       | 2.80    | #1    | 59.00       | 154.00       | 38.31   |
| #2    | 28.00       | 319.00       | 8.78    | #2    | 107.00      | 581.00       | 18.42   |
| #3    | 12.00       | 688.00       | 1.74    | #3    | 58.00       | 265.00       | 21.89   |
| Total | 53.00       | 1472.00      |         | Total | 224.00      | 1000.00      |         |
|       |             | <b>Mean</b>  | 4.44    |       |             | <b>Mean</b>  | 26.21   |
|       |             | <b>SD</b>    | 3.79    |       |             | <b>SD</b>    | 10.63   |

**Supplemental Table 2**

| <b>Supporting Data for Fig. 3G</b> |                |                   |                   |                                      |                |                   |                   |
|------------------------------------|----------------|-------------------|-------------------|--------------------------------------|----------------|-------------------|-------------------|
| <b>R26mTmG/+;Hes1CreERT2/+</b>     |                |                   |                   | <b>R26mTmG/+;ArL/Y;Hes1CreERT2/+</b> |                |                   |                   |
| <b>Sample</b>                      | <b>GFP+AR+</b> | <b>Total GFP+</b> | <b>Percentage</b> | <b>Sample</b>                        | <b>GFP+AR+</b> | <b>Total GFP+</b> | <b>Percentage</b> |
| <b>#1</b>                          | 46             | 48                | 95.8              | <b>#1</b>                            | 10             | 60                | 16.7              |
| <b>#2</b>                          | 57             | 57                | 100.0             | <b>#2</b>                            | 35             | 105               | 33.3              |
| <b>#3</b>                          | 51             | 56                | 91.1              | <b>#3</b>                            | 29             | 127               | 22.8              |
| <b>#4</b>                          | 34             | 34                | 100.0             | <b>#4</b>                            | 29             | 63                | 46.0              |
| <b>#5</b>                          | 71             | 72                | 98.6              | <b>#5</b>                            | 16             | 70                | 22.9              |
| <b>#6</b>                          | 41             | 44                | 93.2              | <b>#6</b>                            | 24             | 68                | 35.3              |
| <b>#7</b>                          | 49             | 51                | 96.1              | <b>#7</b>                            | 22             | 70                | 31.4              |
| <b>#8</b>                          | 110            | 121               | 90.9              | <b>#8</b>                            | 33             | 152               | 21.7              |
|                                    |                | <b>Mean</b>       | <b>95.7</b>       |                                      |                | <b>Mean</b>       | <b>28.8</b>       |
|                                    |                | <b>SD</b>         | <b>3.8</b>        |                                      |                | <b>SD</b>         | <b>9.5</b>        |

**Supplemental Table 3**

| <b>Supporting Data for Fig. 3G-budding</b> |             |                                      |            |
|--------------------------------------------|-------------|--------------------------------------|------------|
| <b>R26mTmG/+;Hes1CreERT2/+</b>             |             | <b>R26mTmG/+;ArL/Y;Hes1CreERT2/+</b> |            |
| <b>Sample</b>                              |             | <b>Sample</b>                        |            |
| <b>#1</b>                                  | 21          | <b>#1</b>                            | 6          |
| <b>#2</b>                                  | 18          | <b>#2</b>                            | 7          |
| <b>#3</b>                                  | 19          | <b>#3</b>                            | 9          |
| <b>#4</b>                                  | 17          | <b>#4</b>                            | 4          |
| <b>#5</b>                                  | 18          | <b>#5</b>                            | 6          |
| <b>#6</b>                                  | 16          | <b>#6</b>                            | 8          |
| <b>#7</b>                                  | 25          | <b>#7</b>                            | 9          |
| <b>#8</b>                                  | 26          | <b>#8</b>                            | 14         |
| <b>#9</b>                                  | 24          | <b>#9</b>                            | 11         |
| <b>Mean</b>                                | <b>20.4</b> | <b>Mean</b>                          | <b>8.2</b> |
| <b>SD</b>                                  | <b>3.7</b>  | <b>SD</b>                            | <b>3.0</b> |

**Supplemental Table 4**

| <b>Supporting Data for Fig. 4C</b> |             |                                      |              |
|------------------------------------|-------------|--------------------------------------|--------------|
| <b>R26mTmG/+;Hes1CreERT2/+</b>     |             | <b>R26mTmG/+;ArL/Y;Hes1CreERT2/+</b> |              |
|                                    |             |                                      |              |
| <b>#1</b>                          | 84          | <b>#1</b>                            | 270          |
| <b>#2</b>                          | 66          | <b>#2</b>                            | 251          |
| <b>#3</b>                          | 49          | <b>#3</b>                            | 248          |
| <b>Mean</b>                        | <b>66.3</b> | <b>Mean</b>                          | <b>256.3</b> |
| <b>SD</b>                          | <b>17.5</b> | <b>SD</b>                            | <b>11.9</b>  |

Supplemental Table 5

| Supporting Data for Fig. 4H |         |             |             |                               |         |             |             |
|-----------------------------|---------|-------------|-------------|-------------------------------|---------|-------------|-------------|
| R26mTmG/+;Hes1CreERT2/+     |         |             |             | R26mTmG/+;ArL/Y;Hes1CreERT2/+ |         |             |             |
|                             | GFP+AR+ | Total GFP+  | Percentage  |                               | GFP+AR+ | Total GFP+  | Percentage  |
| #1                          | 160     | 181         | 88.4        | #1                            | 55      | 141         | 39.0        |
| #3                          | 56      | 56          | 100.0       | #2                            | 41      | 71          | 57.7        |
| #4                          | 139     | 139         | 100.0       | #3                            | 89      | 353         | 25.2        |
| #5                          | 212     | 242         | 87.6        | #4                            | 47      | 109         | 43.1        |
| #7                          | 129     | 148         | 87.2        | #5                            | 17      | 58          | 29.3        |
| #8                          | 122     | 128         | 95.3        | #6                            | 32      | 99          | 32.3        |
| #10                         | 66      | 69          | 95.7        | #7                            | 77      | 241         | 32.0        |
| #11                         | 188     | 199         | 94.5        | #8                            | 31      | 84          | 36.9        |
| <b>Total</b>                | 1072    | 1162        |             | <b>Total</b>                  | 389     | 1156        |             |
|                             |         | <b>Mean</b> | <b>93.6</b> |                               |         | <b>Mean</b> | <b>36.9</b> |
|                             |         | <b>SD</b>   | <b>5.3</b>  |                               |         | <b>SD</b>   | <b>10.1</b> |

Supplemental Table 6

| Supporting Data for Fig. 4I |            |            |            |                               |            |            |            |
|-----------------------------|------------|------------|------------|-------------------------------|------------|------------|------------|
| R26mTmG/+;Hes1CreERT2/+     |            |            |            | R26mTmG/+;ArL/Y;Hes1CreERT2/+ |            |            |            |
|                             | PCNA+ GFP+ | Total GFP+ | Percentage |                               | PCNA+ GFP+ | Total GFP+ | Percentage |
| #1                          | 11         | 68         | 16.2       | #1                            | 3          | 241        | 1.2        |
| #2                          | 19         | 129        | 14.7       | #2                            | 2          | 100        | 2.0        |
| #3                          | 25         | 334        | 7.5        | #3                            | 4          | 144        | 2.8        |
| #4                          | 16         | 133        | 12.0       | #4                            | 0          | 83         | 0.0        |
| #5                          | 18         | 89         | 20.2       | #5                            | 7          | 159        | 4.4        |
| #6                          | 31         | 176        | 17.6       | #6                            | 6          | 74         | 8.1        |
| #7                          | 12         | 53         | 22.6       | #7                            | 2          | 108        | 1.9        |
| #8                          | 11         | 78         | 14.1       | #8                            | 3          | 66         | 4.5        |
| #9                          | 8          | 100        | 8.0        | #9                            | 3          | 98         | 3.1        |
| Total                       | 151        | 1160       |            | Total                         | 30         | 1073       |            |
|                             |            | Mean       | 14.8       |                               |            | Mean       | 3.1        |
|                             |            | SD         | 5.1        |                               |            | SD         | 2.4        |

Supplemental Table 7

| Supporting Data for Fig. 5F |              |              |            |                               |              |              |            |
|-----------------------------|--------------|--------------|------------|-------------------------------|--------------|--------------|------------|
| R26mTmG/+;Hes1CreERT2/+     |              |              |            | R26mTmG/+;ArL/Y;Hes1CreERT2/+ |              |              |            |
|                             | PCNA+ E-cad+ | Total E-cad+ | Percentage |                               | PCNA+ E-cad+ | Total E-cad+ | Percentage |
| #1                          | 24           | 308          | 7.8        | #1                            | 3            | 61           | 4.9        |
| #2                          | 6            | 59           | 10.2       | #2                            | 5            | 99           | 5.1        |
| #3                          | 20           | 165          | 12.1       | #3                            | 2            | 108          | 1.9        |
| #4                          | 8            | 77           | 10.4       | #4                            | 3            | 67           | 4.5        |
| #5                          | 13           | 144          | 9.0        | #5                            | 2            | 81           | 2.5        |
| #6                          | 4            | 78           | 5.1        | #6                            | 2            | 46           | 4.3        |
| #7                          | 3            | 53           | 5.7        | #7                            | 1            | 173          | 0.6        |
| #8                          | 17           | 181          | 9.4        | #8                            | 6            | 194          | 3.1        |
| #9                          | 4            | 41           | 9.8        | #9                            | 5            | 216          | 2.3        |
| <b>Total</b>                | 99           | 1106         |            | <b>Total</b>                  | 29           | 1045         |            |
|                             |              | <b>Mean</b>  | <b>8.8</b> |                               |              | <b>Mean</b>  | <b>3.2</b> |
|                             |              | <b>SD</b>    | <b>2.3</b> |                               |              | <b>SD</b>    | <b>1.6</b> |

Supplemental Table 8

| Supporting data For Figure 6H prior to Regeneration |                         |            |             |            |                               |            |             |            |  |
|-----------------------------------------------------|-------------------------|------------|-------------|------------|-------------------------------|------------|-------------|------------|--|
| AP                                                  | R26mTmG/+ Hes1CreERT2/+ | GFP+ cells | Total cells | Percentage | R26mTmG/+ ArL/Y Hes1CreERT2/+ | GFP+ cells | Total cells | Percentage |  |
| #1                                                  |                         | 81         | 574         | 14.1       | #1                            | 55         | 348         | 15.8       |  |
| #2                                                  |                         | 21         | 215         | 9.8        | #2                            | 41         | 363         | 11.3       |  |
| #3                                                  |                         | 65         | 333         | 19.5       | #3                            | 49         | 481         | 10.2       |  |
|                                                     |                         |            | Mean        | 14.5       |                               |            | Mean        | 12.4       |  |
|                                                     |                         |            | SD          | 7.7        |                               |            | SD          | 3.0        |  |
| DLP                                                 | R26mTmG/+ Hes1CreERT2/+ | GFP+ cells | Total cells | Percentage | R26mTmG/+ ArL/Y Hes1CreERT2/+ | GFP+ cells | Total cells | Percentage |  |
| #1                                                  |                         | 56         | 466         | 12.0       | #1                            | 59         | 299         | 19.7       |  |
| #2                                                  |                         | 29         | 551         | 5.3        | #2                            | 45         | 398         | 11.3       |  |
| #3                                                  |                         | 29         | 486         | 6.0        | #3                            | 21         | 361         | 5.8        |  |
|                                                     |                         |            | Mean        | 7.7        |                               |            | Mean        | 12.3       |  |
|                                                     |                         |            | SD          | 3.7        |                               |            | SD          | 7.0        |  |
| VP                                                  | R26mTmG/+ Hes1CreERT2/+ | GFP+ cells | Total cells | Percentage | R26mTmG/+ ArL/Y Hes1CreERT2/+ | GFP+ cells | Total cells | Percentage |  |
| #1                                                  |                         | 91         | 410         | 22.2       | #1                            | 94         | 470         | 20.0       |  |
| #2                                                  |                         | 39         | 508         | 7.7        | #2                            | 55         | 308         | 17.9       |  |
| #3                                                  |                         | 59         | 288         | 20.5       | #3                            | 67         | 477         | 14.0       |  |
|                                                     |                         |            | Mean        | 16.8       |                               |            | Mean        | 17.3       |  |
|                                                     |                         |            | SD          | 7.9        |                               |            | SD          | 3.0        |  |
| Supporting data For Figure 6H post Regeneration     |                         |            |             |            |                               |            |             |            |  |
| AP                                                  | R26mTmG/+ Hes1CreERT2/+ | GFP+ cells | Total cells | Percentage | R26mTmG/+ ArL/Y Hes1CreERT2/+ | GFP+ cells | Total cells | Percentage |  |
| #1                                                  |                         | 208        | 599         | 34.7       | #1                            | 88         | 355         | 24.8       |  |
| #2                                                  |                         | 111        | 358         | 31.0       | #2                            | 50         | 514         | 9.7        |  |
| #3                                                  |                         | 108        | 366         | 29.5       | #3                            | 20         | 209         | 9.6        |  |
|                                                     |                         |            | Mean        | 31.7       |                               |            | Mean        | 14.7       |  |
|                                                     |                         |            | SD          | 2.7        |                               |            | SD          | 8.7        |  |
| DLP                                                 | R26mTmG/+ Hes1CreERT2/+ | GFP+ cells | Total cells | Percentage | R26mTmG/+ ArL/Y Hes1CreERT2/+ | GFP+ cells | Total cells | Percentage |  |
| #1                                                  |                         | 258        | 419         | 61.6       | #1                            | 29         | 209         | 13.9       |  |
| #2                                                  |                         | 360        | 581         | 62.0       | #2                            | 94         | 361         | 26.0       |  |
| #3                                                  |                         | 208        | 388         | 53.6       | #3                            | 77         | 308         | 25.0       |  |
|                                                     |                         |            | Mean        | 59.0       |                               |            | Mean        | 21.6       |  |
|                                                     |                         |            | SD          | 4.7        |                               |            | SD          | 6.7        |  |
| VP                                                  | R26mTmG/+ Hes1CreERT2/+ | GFP+ cells | Total cells | Percentage | R26mTmG/+ ArL/Y Hes1CreERT2/+ | GFP+ cells | Total cells | Percentage |  |
| #1                                                  |                         | 221        | 294         | 75.2       | #1                            | 78         | 388         | 20.1       |  |
| #2                                                  |                         | 292        | 588         | 49.7       | #2                            | 194        | 613         | 31.6       |  |
| #3                                                  |                         | 209        | 332         | 63.0       | #3                            | 166        | 383         | 43.3       |  |
|                                                     |                         |            | Mean        | 62.6       |                               |            | Mean        | 31.7       |  |
|                                                     |                         |            | SD          | 12.8       |                               |            | SD          | 11.6       |  |
